# Supplementary material for: Salt suppresses IFNγ inducible chemokines through the IFNγ-JAK1-STAT1 signaling pathway in proximal tubular cells
Source: PubMed Central journal article supplement (PMC5397865; doi:10.1038/srep46580), 2017-04-20

## **Salt suppresses IFN $\gamma$ inducible chemokines through the IFN $\gamma$ -JAK1-STAT1 signaling pathway in proximal tubular cells**

Yohei Arai<sup>1</sup>, Daiei Takahashi<sup>1</sup>, Kenichi Asano<sup>2</sup>, Masato Tanaka<sup>2</sup>, Mayumi Oda<sup>3</sup>, Shigeru B. H. Ko<sup>3</sup>, Minoru S. H. Ko<sup>3</sup>, Shintaro Mandai<sup>1</sup>, Naohiro Nomura<sup>1</sup>, Tatemitsu Rai<sup>1</sup>, Shinichi Uchida<sup>1</sup>, and Eisei Sohara<sup>1\*</sup>

<sup>1</sup>Department of Nephrology, Graduate School of Medical and Dental Sciences, Tokyo Medical and Dental University (TMDU), Tokyo, Japan.

<sup>2</sup>Laboratory of Immune regulation, School of Life Science, Tokyo University of Pharmacy and Life Sciences, Tokyo, Japan.

<sup>3</sup>Department of Systems Medicine, Keio University School of Medicine, Tokyo, Japan.

\*Corresponding author: Eisei Sohara

Department of Nephrology, Graduate School of Medical and Dental Sciences, Tokyo Medical and Dental University (TMDU)

1-5-45 Yushima, Bunkyo, Tokyo 113-8519, Japan

Tel: +81-3-5803-5214; Fax: +81-3-5803-5215; E-mail: [esohara.kid@tmd.ac.jp](mailto:esohara.kid@tmd.ac.jp)

**Blood and urine measurements.**

Blood was obtained from the maxillary vein under light ether anesthesia. Blood electrolyte levels were determined with an i-STAT® Portable Clinical Analyzer (Fuso, Japan). The plasma and urine osmolality were measured with a Fiske One-ten Osmometer. Urine electrolyte levels were analyzed by DRI-CHEM (Fujifilm, Japan).

**Supplementary Table S1.** The comparison of blood and urine analyses between C57BL/6 mice fed a high salt diet for 7days (n = 6) and C57BL/6 mice fed a normal diet (n = 5).

|                                      | C57BL/6<br>normal salt diet<br>(n = 5) | C57BL/6<br>8% high salt diet<br>(n = 6) | p-value |
|--------------------------------------|----------------------------------------|-----------------------------------------|---------|
| Blood Na concentration (mEq/L)       | 149.8 ± 0.5                            | 153.6 ± 0.8                             | <0.01   |
| Urine Na concentration (mEq/L)       | 274.0 ± 16.3                           | 376.6 ± 21.0                            | <0.01   |
| Daily urinary Na excretion (mEq/day) | 0.43 ± 0.07                            | 5.28 ± 0.12                             | <0.01   |
| Daily urine output (ml/day)          | 1.6 ± 0.3                              | 14.2 ± 0.9                              | <0.01   |
| Plasma osmolality (mOsm/L)           | 265.2 ± 7.2                            | 263.3 ± 5.0                             | 0.75    |
| Urine osmolality (mOsm/L)            | 2088.0 ± 214.2                         | 913.5 ± 28.2                            | <0.01   |

**Supplementary Table S2.** The comparison of blood and urine analyses between *WNK4<sup>D561A/+</sup>* mice fed a high salt diet for 7days (n = 4) and *WNK4<sup>+/+</sup>* littermates fed a normal diet (n = 5).

|                                      | <i>WNK4<sup>+/+</sup></i><br>normal salt diet<br>(n = 5) | <i>WNK4<sup>D561A/+</sup></i><br>8% high salt diet<br>(n = 4) | p-value |
|--------------------------------------|----------------------------------------------------------|---------------------------------------------------------------|---------|
| Blood Na concentration (mEq/L)       | 149.2 ± 0.86                                             | 153.5 ± 1.19                                                  | 0.01    |
| Urine Na concentration (mEq/L)       | 260.0 ± 7.0                                              | 375.0 ± 37.7                                                  | 0.01    |
| Daily urinary Na excretion (mEq/day) | 0.64 ± 0.05                                              | 5.06 ± 0.13                                                   | <0.01   |
| Daily urine output (ml/day)          | 2.4 ± 0.1                                                | 13.9 ± 1.5                                                    | <0.01   |
| Plasma osmolality (mOsm/L)           | 265.7 ± 1.8                                              | 267.5 ± 1.8                                                   | 0.29    |
| Urine osmolality (mOsm/L)            | 1950.0 ± 67.9                                            | 939.0 ± 75.1                                                  | <0.01   |

**Supplementary Table S3.** The primer sequences used qRT-PCR

| <b>Genes</b>         |         | <b>Sequences(5-3)</b>              |
|----------------------|---------|------------------------------------|
| Mouse Cxcl9          | Forward | CAC GAT CCA CTA CAA ATC CC         |
|                      | Reverse | TTC ACA TTT GCC GAG TCC            |
| Mouse Cxcl10         | Forward | TTC TTT AAG GGC TGG TCG GAG        |
|                      | Reverse | GTC GCA CCT CCA CAT AGC            |
| Mouse Cxcl11         | Forward | GTT GAA GTG ATT GTT ACT ATG AAG    |
|                      | Reverse | TGG CAC AGA GTT CTT ATT GG         |
| Mouse Cxcr3          | Forward | GCC TGA ACT TTG ACA GAA            |
|                      | Reverse | GGA AGA GTT AAC ACC AGC            |
| Human CXCL9          | Forward | GGA GTG CAA GGA ACC CCA GTA        |
|                      | Reverse | GGT GGA TAG TCC CTT GGT TGG T      |
| Human CXCL10         | Forward | TCC ACG TGT TGA GAT CAT TGC T      |
|                      | Reverse | TGA TGG CCT TCG ATT CTG GAT        |
| Human CXCL11         | Forward | GCT ATA GCC TTG GCT GTG ATA TTG TG |
|                      | Reverse | CTG CCA CTT TCA CTG CTT TTA CC     |
| Human $\beta$ -ACTIN | Forward | TGG CAT TGC CGA CAG GAT GC         |
|                      | Reverse | TCC ACA CGG AGT ACT TGC GC         |

**Supplementary Figure S1.**

**Full-length western blot images of the cropped blots shown in Figure 2.  
The hatched red lines delineate the correct sized bands for each protein.**

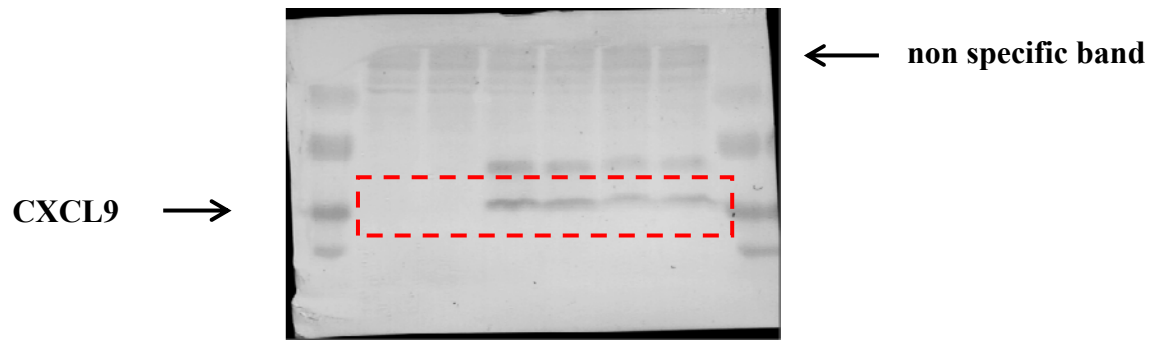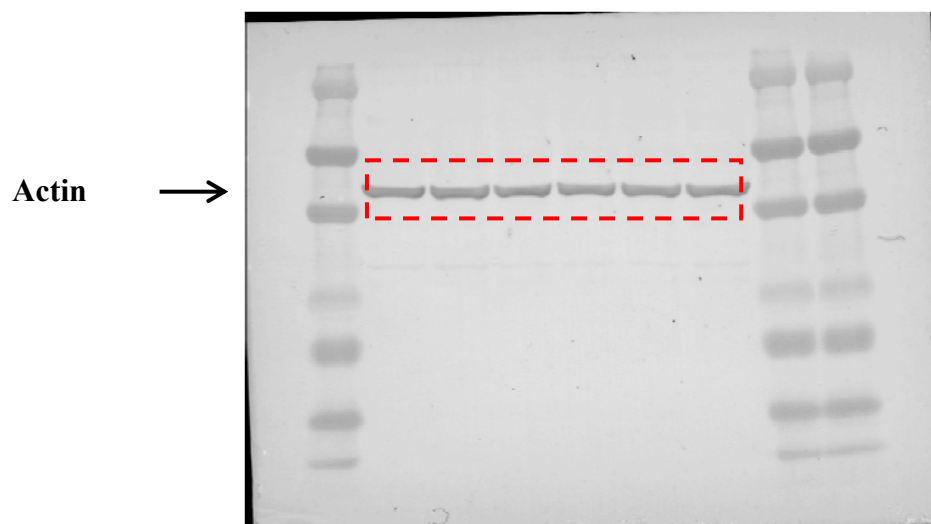

**Supplementary Figure S2.**

**Full-length western blot images of the cropped blots shown in Figure 4A.  
The hatched red lines delineate the correct sized bands for each protein.**

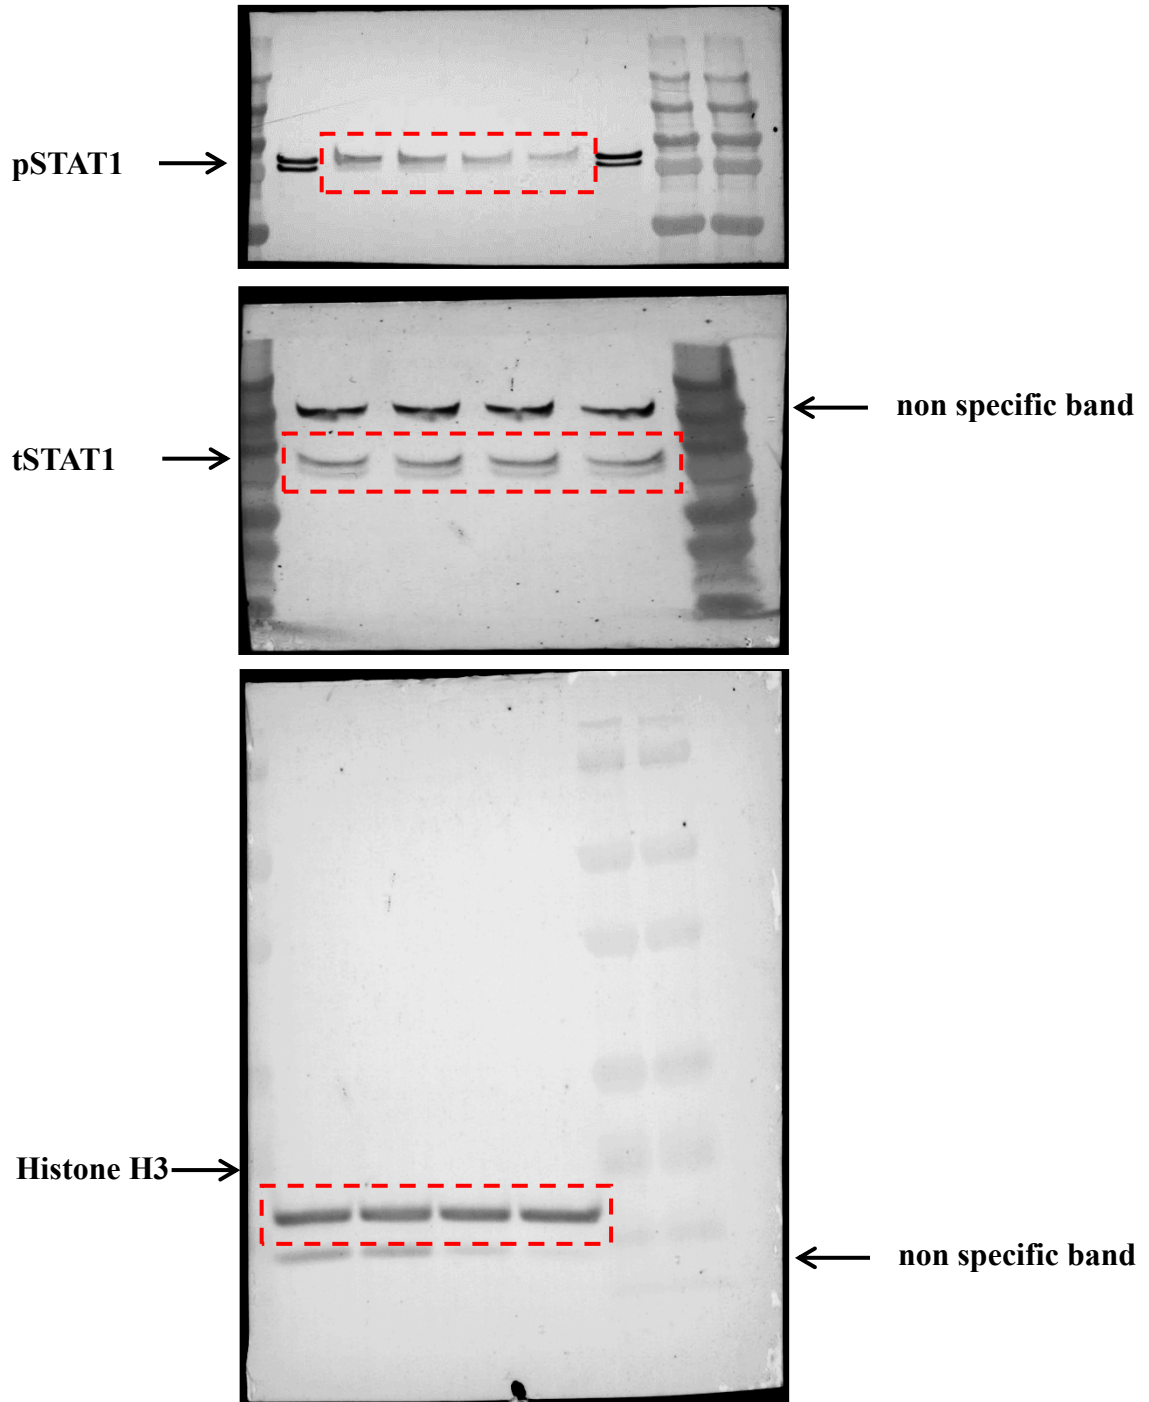

**Supplementary Figure S3.**

**Full-length western blot images of the cropped blots shown in Figure 4B.  
The hatched red lines delineate the correct sized bands for each protein.**

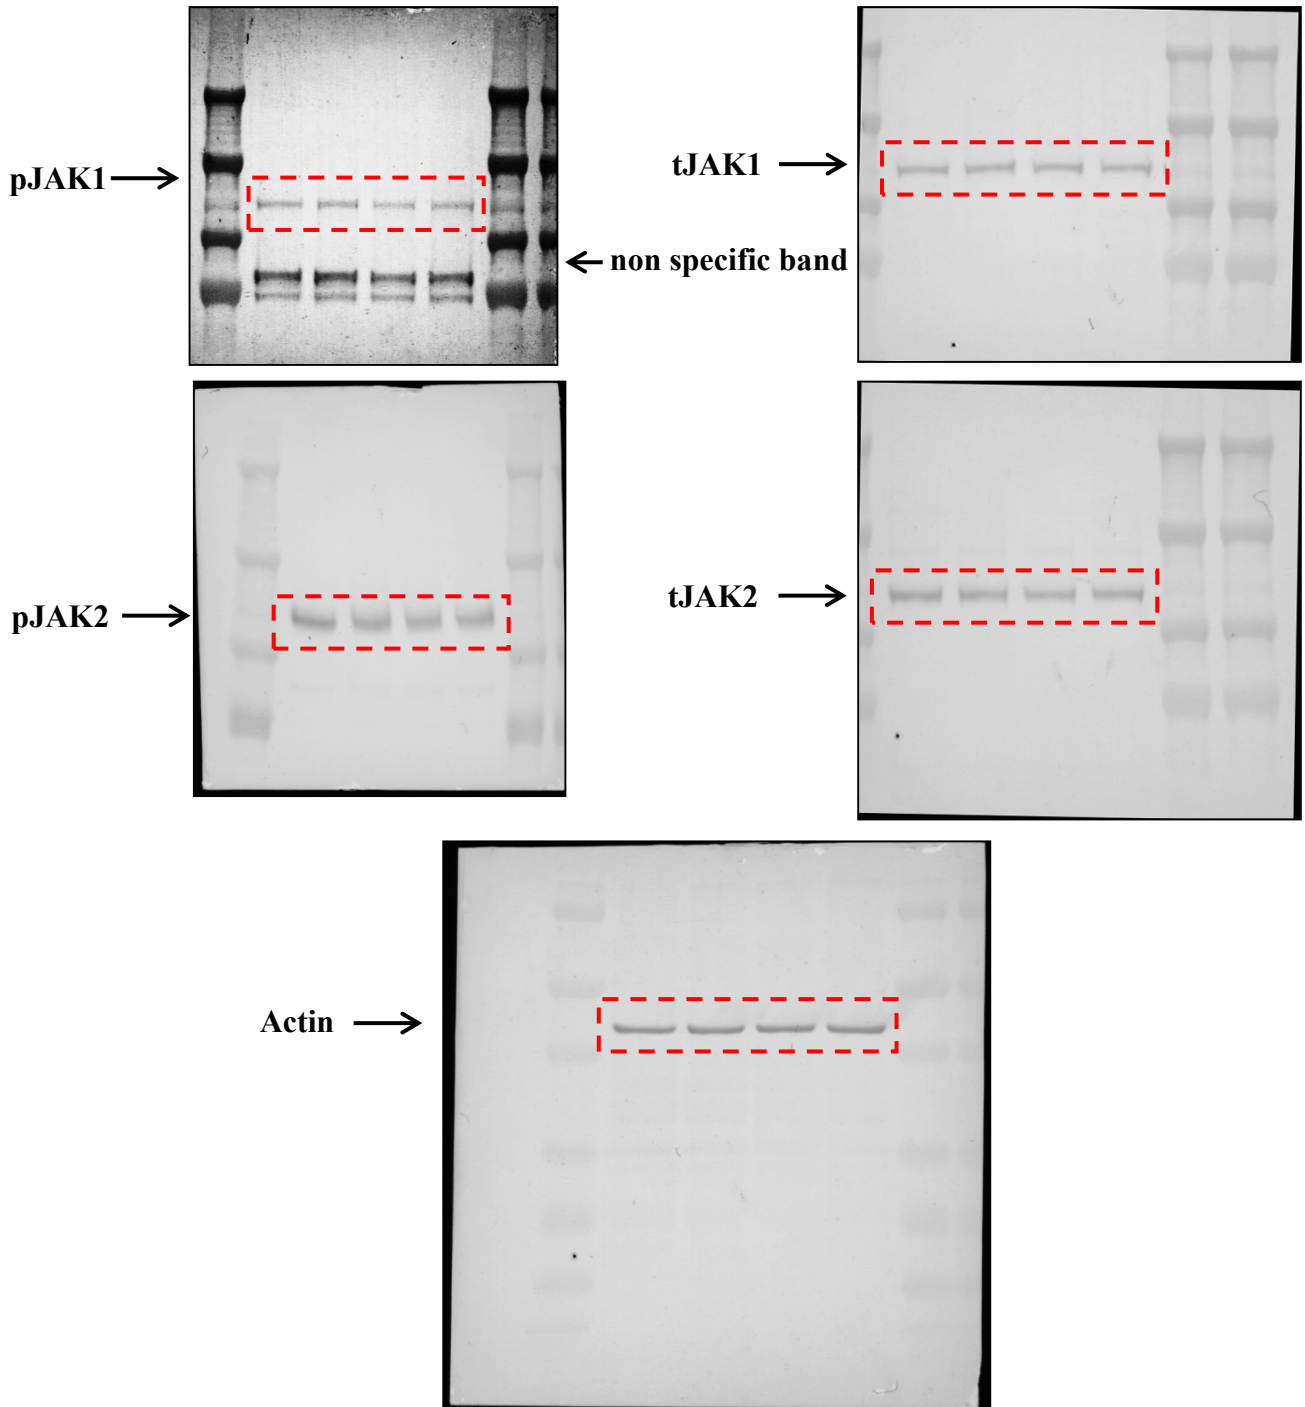

**Supplementary Figure S4.**

**Full-length western blot images of the cropped blots shown in Figure 5.  
The hatched red lines delineate the correct sized bands for each protein.**

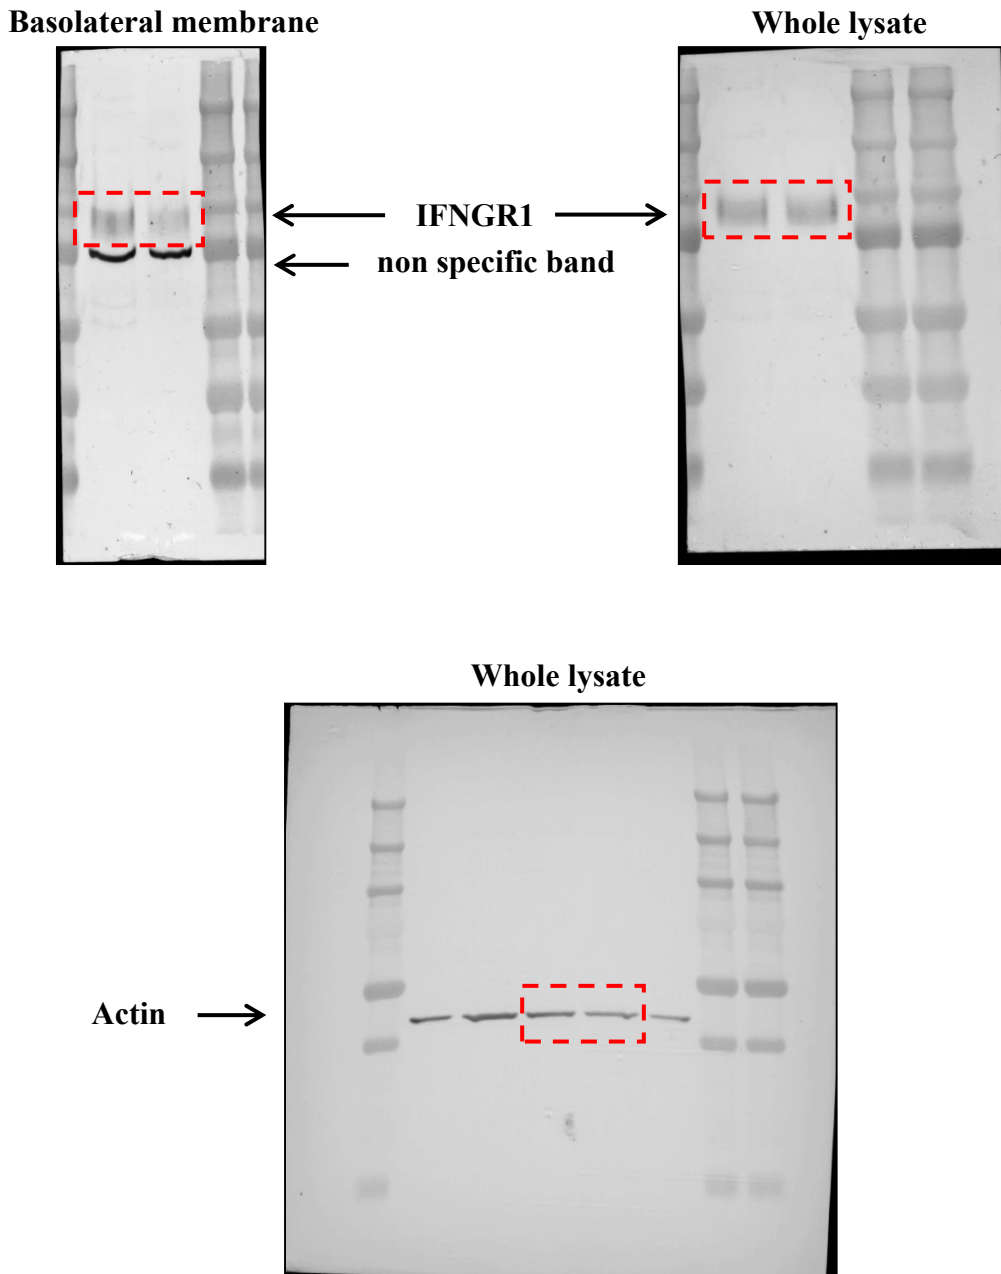

**Supplementary Figure S5.**

**Full-length western blot images of the cropped blots shown in Figure 6.  
The hatched red lines delineate the correct sized bands for each protein.**

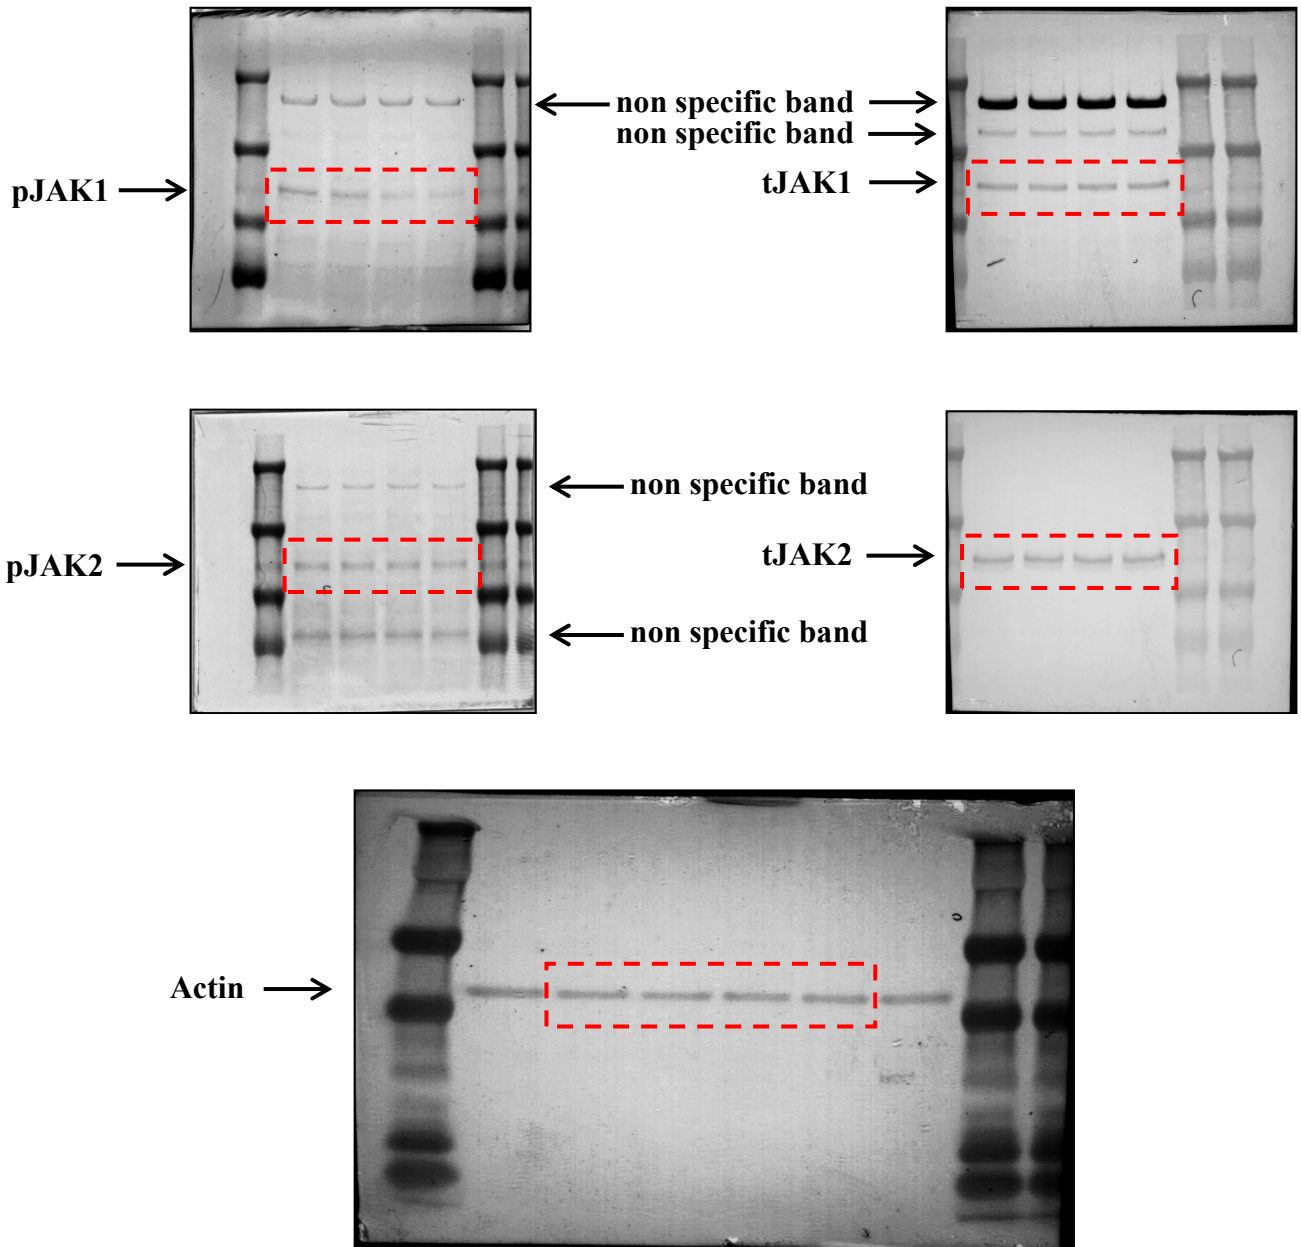



**Supplementary Figure S6.**

**Full-length western blot images of the cropped blots shown in Figure 7.  
The hatched red lines delineate the correct sized bands for each protein.**

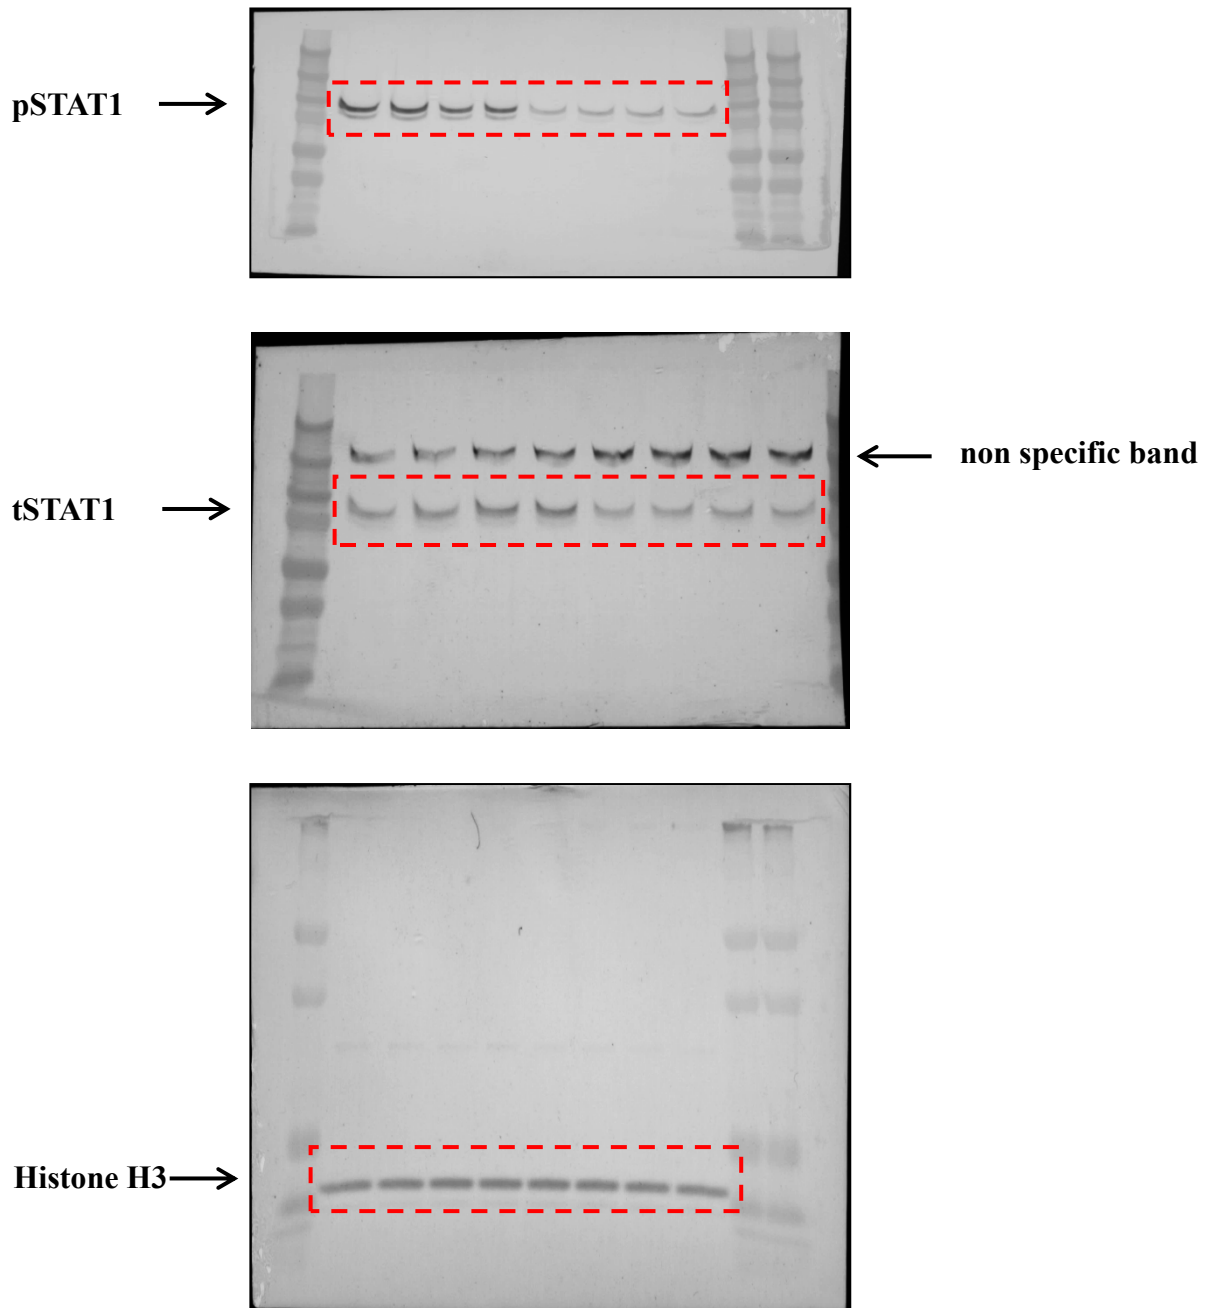

Supplement: srep46580-s1.pdf [file srep46580-s1.pdf]
